# Supplementary material
Source: publisher figshare collection journal article supplement (https://asha.figshare.com/articles/dataset/_/27745437)
Supplement: Supplementary file 1 [file 2]

**Supplemental Material S2.** Summary of multiple regression models run within group.

|                                    | Sibs-autism  |              |              |              | Sibs-NA        |                   |               |               |
|------------------------------------|--------------|--------------|--------------|--------------|----------------|-------------------|---------------|---------------|
|                                    | Model 1      | Model 2      | Model 3      | Model 4      | Model 1        | Model 2           | Model 3       | Model 4       |
| <b>Variable <math>\beta</math></b> |              |              |              |              |                |                   |               |               |
| 1. Intentional Communication       | .292         | .391         | .176         | .269         | .566**         | .351 <sup>‡</sup> | .564**        | .351          |
| 2. Vocalization Complexity         |              | -.251        | —            | -.197        |                | .416 <sup>‡</sup> | —             | .412          |
| 3. Responding to Joint Attention   |              | —            | .302         | .262         |                | —                 | -.099         | -.089         |
| <b>Model Fit Statistics</b>        |              |              |              |              |                |                   |               |               |
| $F(df)$                            | 2.33 (1, 25) | 1.93 (2, 24) | 2.34 (2, 24) | 1.85 (3, 23) | 9.41 (1, 20)** | 7.66 (2,19)**     | 4.68 (2, 19)* | 4.99 (3, 18)* |
| Total $R^2$                        | .085         | .138         | .163         | .194         | .320           | .444              | .330          | .454          |
| <b>Comparison to Model 1</b>       |              |              |              |              |                |                   |               |               |
| $\Delta R^2$                       | —            | .053         | .025         | .031         | —              | .124              | .114          | .124          |
| Model Fit Improvement $p$          | —            | .235         | .147         | .231         | —              | .051              | .603          | .138          |

<sup>‡</sup> $p < .1$ . \* $p < .05$ . \*\* $p < .01$ .
