# Supplementary material
Source: publisher figshare collection journal article supplement (https://asha.figshare.com/articles/dataset/_/27745437)
Supplement: Supplementary file 2 [file 2]

# **Supplemental Material S1. Reliability of coded variables.**

| Variable                               | ICC  | <i>n</i> (%) | <i>p</i> | Interpretation |
|----------------------------------------|------|--------------|----------|----------------|
| <i>Time 1 (Predictors of Interest)</i> |      |              |          |                |
| Responding to Joint Attention          | .835 | 15 (29%)     | < .001   | Good           |
| Intentional Communication              | .916 | 10 (20%)     | < .001   | Excellent      |
| Number of Consonants                   | .771 | 15 (29%)     | < .001   | Good           |
| Communication Acts Using a Consonant   | .947 | 14 (27%)     | < .001   | Excellent      |
| <i>Time 2 (Expressive Language)</i>    |      |              |          |                |
| Mean Length of Utterance (MLU)         | .972 | 9 (18%)      | < .001   | Excellent      |
| Number of Different Words (NDW)        | .973 | 9 (18%)      | < .001   | Excellent      |

*Note.* Time 1 = 12-18 months; Time 2 = 9 months later (i.e., 21-27 months); ICC = intraclass correlation coefficient; *n* = number of participants (out of total *N* = 51; i.e., %) for whom reliability was conducted. Interpretation based on Koo and Li (2016).
